# Correction: MicroED: a versatile cryoEM method for structure determination

Brent L. Nannenga and Tamir Gonen

*Emerging Topics in Life Sciences* (2018) 2, 1–8; <https://doi.org/10.1042/ETLS20170082>

1. The following sentence from the section “Microscopes, cameras, and data collection” (page 2) should have clarified that no *protein* structures making use of direct electron detectors had been published at the time of the article’s publication. The amended sentence, with clarification underlined, is presented here.

*“Direct electron detectors (Gatan K2 and K3, FEI Falcon detectors, and Direct Electron cameras) can be used to collect diffraction data at a high rate; however, there are not currently any published MicroED protein structures making use of these detectors as the data from CMOS detectors are already of extremely high quality.”*

2. The following sentence from the section “MicroED for biological macromolecules” (page 4) cited the wrong reference. The citation should have been to reference 11, not reference 10, i.e.

*“The effect of dynamical scattering in MicroED was probed more deeply recently [11], indicating that dynamical scattering does not inhibit structure determination even from crystals as thick as ~500 nm”*

Reference 11 is Martynowycz, M.W., Glynn, C., Miao, J., de la Cruz, M.J., Hattne, J., Shi, D. et al. (2017) MicroED structures from micrometer thick protein crystals. *BioRxiv* <https://doi.org/10.1101/152504>

3. The following sentence from the section “Applications to small-molecule and materials science structures” (page 5) cited the wrong reference. The citation should have been to a reference that was inadvertently omitted from the published article, not to reference 45.

*“Continuous rotation data collection facilitated the structure determination of a radiation-sensitive novel zeolite, ITQ-58 [Simancas et al. 2016].”*

The reference that was inadvertently omitted is Simancas, J., Simancas, R., Bereciartua, P.J., Jorda, J.L., Rey, F., Corma, A. et al. (2016) Ultrafast electron diffraction tomography for structure determination of the new zeolite ITQ-58. *J. Am. Chem. Soc.* **138**, 10116–10119, <https://doi.org/10.1021/jacs.6b06394>

Correction published:  
28 September 2018
